# Supplementary material for: For better or worse: Factors predicting outcomes of family care of older people over a one-year period. A six-country European study
Source: PubMed Central journal article supplement (PMC5882153; doi:10.1371/journal.pone.0195294), 2018-04-03

# Distribution of adjusted inverse probability weights

Comparison of the adjusted inverse probability weights for respondents (green) and non-respondents (red). Patterns indicate that our follow-up sample is rather a 'representative' subset of the baseline data.

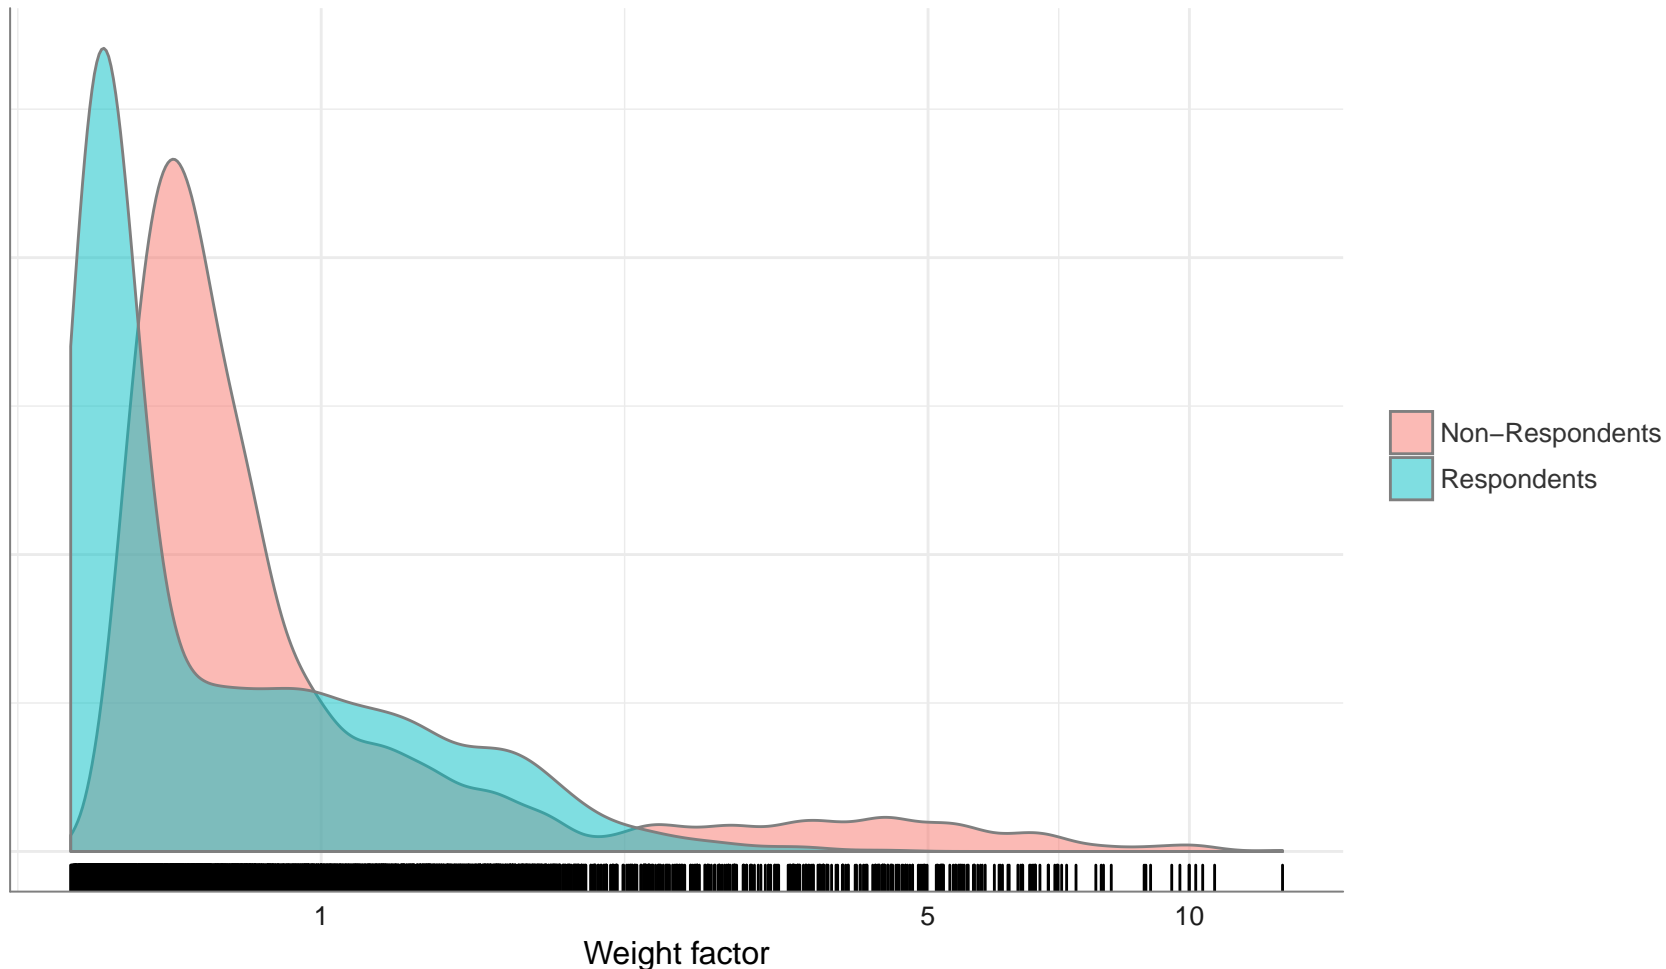

Supplement: pone.0195294.s002.pdf [file pone.0195294.s002.pdf]
